# Supplementary material for: The Efficacy of HGF/VEGF Gene Therapy for Limb Ischemia in Mice with Impaired Glucose Tolerance: Shift from Angiogenesis to Axonal Growth and Oxidative Potential in Skeletal Muscle
Source: MDPI journal article supplement (doi:10.3390/cells11233824), 2022-11-29
Supplement: s1 [file s1]

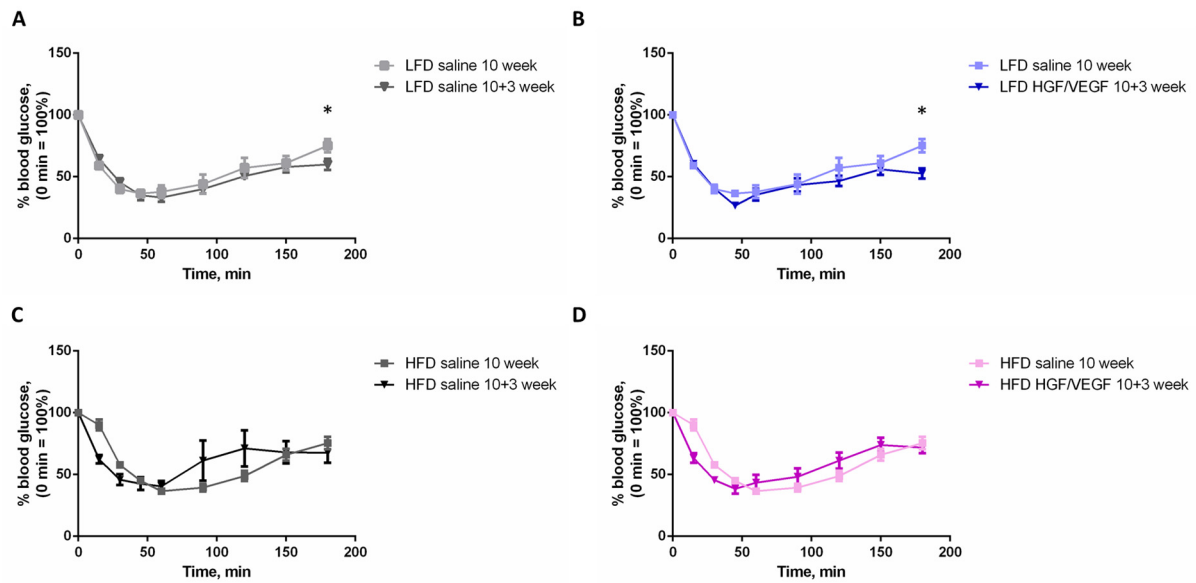

**Supplementary Figure 1.** HGF/VEGF plasmid injection did not affect insulin-dependent glucose clearance in comparison with pre-surgery state. Abbreviations: LFD, low fat diet; HFD, high fat diet; GBD, grain based diet; FBG, fasting blood glucose; GTT, glucose tolerance test; ITT, insulin tolerance test. Data are represented as mean  $\pm$  SEM, Kruskal-Wallis test with post-hoc Dunn's test, significance threshold  $p < 0.05$
